# Supplementary material
Source: HighWire-hosted journal article supplement (https://rc.rcjournal.com/highwire/filestream/11879/field_highwire_adjunct_files/0/RC-01263.R1_Bingham-Interview_Guide.pdf)
Supplement: RC-01263.R1_Bingham-Interview_Guide.pdf [file RC-01263.R1_Bingham-Interview_Guide.pdf]

7/3/08

**Breath Biofeedback Video Game Diagnostic Interview Guide**

**First I'd like to ask you a few questions about what you do to have fun.**

1. Do you like to play video games?

If yes, how often do you play them?

\_\_\_\_ Once a month

\_\_\_\_ Once a week

\_\_\_\_ 2-3 times a week

\_\_\_\_ Every day

2. What are the names of your favorite video games to play?

3. How would you describe your favorite video game? Or games?

Probe for what they involve, include and look like

i.e.

Sports?

Brain teasers?

Damaging or "taking out the enemy"

Driving or racing

Music

Other

4. Other than video games, or if you don't like video games, what else do you do for fun?

At home?

At school?

In the hospital?

5. What would you think about a video game where you could control what happens on the screen by breathing?

Probe: On a scale of 1 to 10 where 1 equals "I wouldn't like it at all" and 10 equals "I'd really like it a lot" how do you think you would rate a game like this?

**Now I'm going to ask you to think for a minute about choices. There are things in all of our lives that we choose to do and other things that we have to do but would rather not.**

7/3/08

6. What are some things about which you feel like you have no choice?

Probe: "What are some things you have (must) to do each day but do not choose to do?"

7. What are some of the things about which you feel like you can make your own choices?

Are there things you wish you could do that you haven't done? If yes, can you tell me about one/some of them?

**Now let's talk a little about breathing exercise and CF medications**

8. Has anyone ever told you that you should breathe or practice breathing in any certain way?

If so, what do you think of these activities or exercises?

Would you say that you do these breathing exercises often, sometimes or hardly ever?

Why do you think that is?

9. What about Huffing, is that a breathing exercise you have heard about?

Can you describe what it is?

Have you ever done Huffing exercises?

If so, how did they make you feel?

10. Do you take the kind of medicine that you have to inhale?

11.. What do you think about using the nebulizer treatment? (i.e.taking medicines that you have to breath in).

12. What do you like most about taking inhaled medicines?

13. What do you like least about taking inhaled medicines?

14. What would you say is the main reason that you either do or do not always take your medicine(s)?

**Because of your CF, you sometimes have to spend time in the hospital.**

15. What is most difficult for you about being in the hospital?

7/3/08

Anything else difficult about it?

16. What, if anything about being in the hospital is O.K. or even good?

**Now I have a few questions about just living with CF**

17. Do you ever get together with other kids who have CF?

If so, where and when?

What kinds of things do you do together?

18. What is it like to meet or spend time with other kids with CF?

19. In comparison to friends your own age, what parts of your life are affected because you have CF?

20. Thinking about the things you have to do like take medicines and doing breathing exercises and all which one of these statements best describes how you deal with these things?

#1 I do it because I really want to.

OR

#2 I do it because my doctor or my parents want me to.

What makes you say that?

Would you say you feel this way about most things you do, or only about taking medicines and exercises related to your CF?
